# Supplementary material
Source: PubMed Central journal article supplement (PMC8388192)
Supplement: NIHMS1734280-supplement-Fig_S1_and_Table_S2.pdf [file NIHMS1734280-supplement-Fig_S1_and_Table_S2.pdf]

## Development of antibiotics that dysregulate the *Neisserial* ClpP protease

Gursonika Binopal<sup>1,‡</sup>, Mark F. Mabanglo<sup>1,‡</sup>, Jordan D. Goodreid<sup>2,‡</sup>, Elisa Leung<sup>1,‡</sup>, Marim M. Barghash<sup>1</sup>, Keith S. Wong<sup>1</sup>, Funing Lin<sup>2</sup>, Michele Cossette<sup>2</sup>, Jazmin Bansagi<sup>2</sup>, Boxi Song<sup>2</sup>, Vitor Hugo Balasco Serrão<sup>3</sup>, Emil F. Pai<sup>1,4,5,\*\*</sup>, Robert A. Batey<sup>2,\*\*</sup>, Scott D. Gray-Owen<sup>6,\*\*</sup>, and Walid A. Houry<sup>1,2,\*\*,†</sup>

<sup>1</sup>Department of Biochemistry, University of Toronto, Toronto, Ontario M5G 1M1, Canada.

<sup>2</sup>Department of Chemistry, University of Toronto, Toronto, Ontario M5S 3H6, Canada.

<sup>3</sup>Department of Laboratory Medicine and Pathobiology, University of Toronto, Toronto, ON M5S 1A8, Canada.

<sup>4</sup>Department of Medical Biophysics, University of Toronto, Toronto, Ontario M5S 1A8, Canada.

<sup>5</sup>Ontario Cancer Institute/Princess Margaret Hospital, Toronto, Ontario M5G 1L7, Canada.

<sup>6</sup>Department of Molecular Genetics, University of Toronto, Toronto, Ontario M5S 1A8, Canada.

<sup>‡</sup>These authors contributed equally to this work.

<sup>\*\*</sup>Equally contributing senior authors.

<sup>†</sup>Corresponding author. W. A. Houry, 661 University Avenue, MaRS Centre, West Tower, Room 1612, Toronto, ON M5G 1M1, Canada. Tel.: (416) 946-7141; Fax: (416) 978-8548; Email: [walid.houry@utoronto.ca](mailto:walid.houry@utoronto.ca)

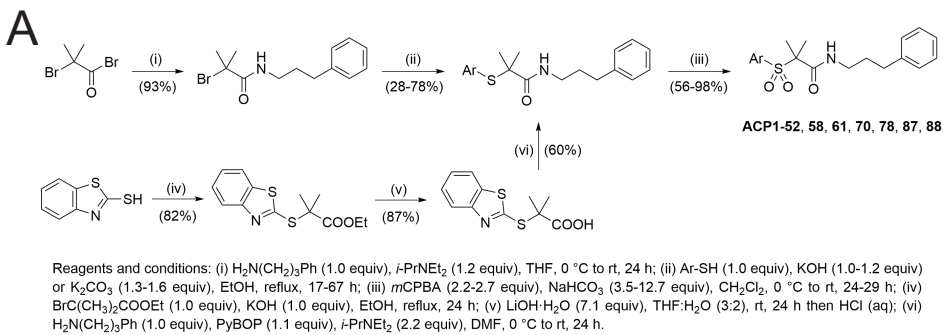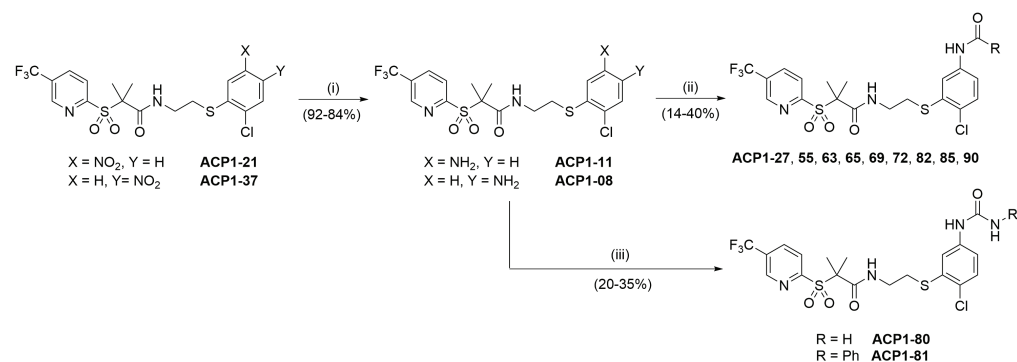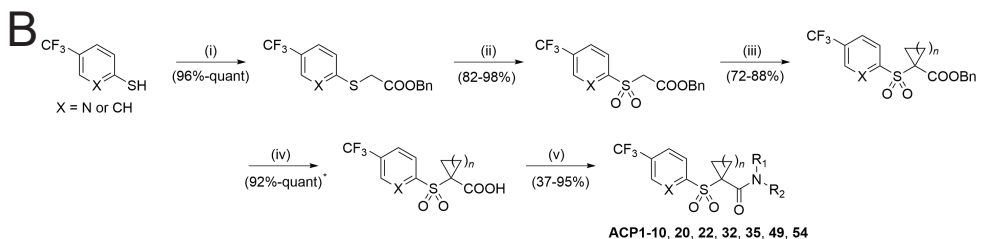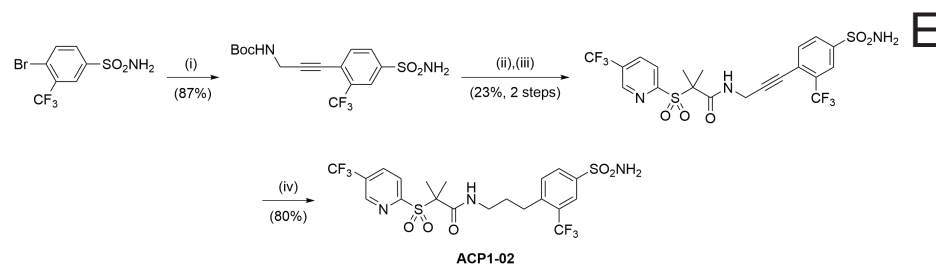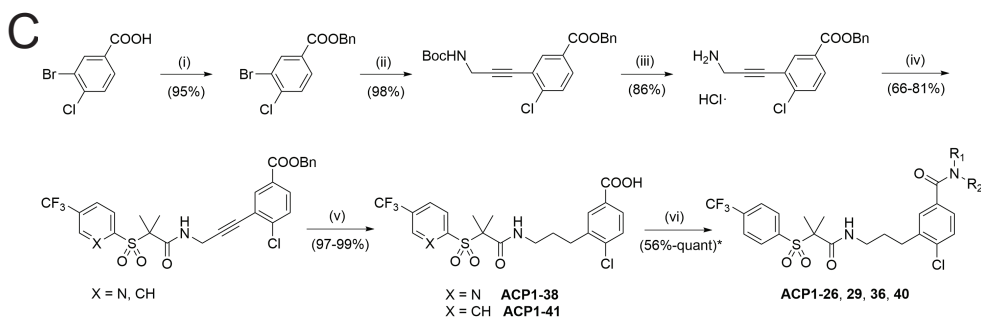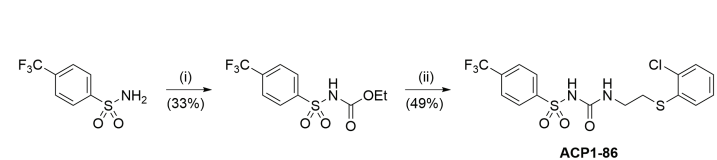

**Figure S1. Detailed synthetic scheme for the remainder of the ACP1 analogs.**  
(A-E) Shown are the detailed synthetic routes for the remainder of the ACP1 analogs.

**Table S2. Naming of ACP1 and ADEP analogs.**

This table correlates our naming of the compounds with the previously published names.

| <b>Compound</b> | <b>Common Name</b>       | <b>Reference</b> |
|-----------------|--------------------------|------------------|
| ACP1-06         | ACP1b                    | 1                |
| ACP1-44         | ACP1a                    | 1                |
| ACP1-45         | ACP1                     | 1                |
| ADEP-01         | n/a                      | 2                |
| ADEP-02         | n/a                      | 2                |
| ADEP-03         | A54556 Factor C (ADEP1C) | 3                |
| ADEP-04         | A54556 Factor D (ADEP1D) | 3                |
| ADEP-05         | A54556 Factor A (ADEP1A) | 3                |
| ADEP-06         | n/a                      | 2, 4             |
| ADEP-07         | n/a                      | 5                |
| ADEP-08         | A54556 Factor B (ADEP1B) | 3                |
| ADEP-11         | ADEP 4                   | 4                |
| ADEP-13         | n/a                      | 5                |
| ADEP-14         | n/a                      | 5                |
| ADEP-15         | n/a                      | 2, 6             |
| ADEP-16         | n/a                      | 3                |
| ADEP-17         | n/a                      | 5                |
| ADEP-18         | n/a                      | 4                |
| ADEP-20         | n/a                      | 6                |
| ADEP-21         | n/a                      | 2                |
| ADEP-22         | n/a                      | 3                |
| ADEP-25         | n/a                      | 2                |
| ADEP-26         | A54556 Factor E (ADEP1E) | 3                |
| ADEP-28         | n/a                      | 7                |
| ADEP-29         | n/a                      | 5                |
| ADEP-30         | n/a                      | 5                |
| ADEP-31         | n/a                      | 3                |
| ADEP-32         | n/a                      | 5                |
| ADEP-34         | n/a                      | 3                |
| ADEP-35         | n/a                      | 3                |
| ADEP-36         | A54556 Factor H (ADEP1H) | 3                |
| ADEP-37         | n/a                      | 2                |
| ADEP-38         | n/a                      | 5                |
| ADEP-40         | n/a                      | 3                |
| ADEP-41         | n/a                      | 7                |
| ADEP-42         | n/a                      | 2                |
| ADEP-43         | n/a                      | 2                |
| ADEP-45         | n/a                      | 2                |
| ADEP-46         | n/a                      | 3                |

## REFERENCES

1. Leung, E., Datti, A., Cossette, M., Goodreid, J., McCaw, S. E., Mah, M., Nakhamchik, A., Ogata, K., El Bakkouri, M., Cheng, Y. Q., Wodak, S. J., Eger, B. T., Pai, E. F., Liu, J., Gray-Owen, S., Batey, R. A., and Houry, W. A. (2011) Activators of cylindrical proteases as antimicrobials: identification and development of small molecule activators of ClpP protease, *Chemistry & biology* 18, 1167-1178.
2. Goodreid, J. D., dos Santos Eda, S., and Batey, R. A. (2015) A Lanthanide(III) Triflate Mediated Macrolactonization/Solid-Phase Synthesis Approach for Depsipeptide Synthesis, *Organic letters* 17, 2182-2185.
3. Goodreid, J. D., Wong, K., Leung, E., McCaw, S. E., Gray-Owen, S. D., Lough, A., Houry, W. A., and Batey, R. A. (2014) Total synthesis and antibacterial testing of the A54556 cyclic acyldepsipeptides isolated from *Streptomyces hawaiiensis*, *Journal of natural products* 77, 2170-2181.
4. Hinzen, B., Raddatz, S., Paulsen, H., Lampe, T., Schumacher, A., Habich, D., Hellwig, V., Benet-Buchholz, J., Endermann, R., Labischinski, H., and Brotz-Oesterhelt, H. (2006) Medicinal chemistry optimization of acyldepsipeptides of the enopeptin class antibiotics, *ChemMedChem* 1, 689-693.
5. Goodreid, J. D., Janetzko, J., Santa Maria, J. P., Jr., Wong, K. S., Leung, E., Eger, B. T., Bryson, S., Pai, E. F., Gray-Owen, S. D., Walker, S., Houry, W. A., and Batey, R. A. (2016) Development and Characterization of Potent Cyclic Acyldepsipeptide Analogues with Increased Antimicrobial Activity, *Journal of medicinal chemistry* 59, 624-646.
6. Hinzen, B., Brötz-Oesterhelt, H., Endermann, R., Henninger, K., Paulsen, H., Raddatz, S., Lampe, T., Hellwig, V., and Schumacher, A. B. A. (2005) Antibacterial macrocycles, (Patent, U., Ed.), USA.
7. Carney, D. W., Schmitz, K. R., Truong, J. V., Sauer, R. T., and Sello, J. K. (2014) Restriction of the conformational dynamics of the cyclic acyldepsipeptide antibiotics improves their antibacterial activity, *Journal of the American Chemical Society* 136, 1922-1929.
